# Supplementary material for: Dendrobium alkaloids decrease Aβ by regulating α- and β-secretases in hippocampal neurons of SD rats
Source: PeerJ. 2019 Sep 6;7:e7627. doi: 10.7717/peerj.7627 (PMC6733236; doi:10.7717/peerj.7627)

**Uncropped images of the original western blots**

**Fig. 4. *DNLA decreased the accumulation of Aβthrough decreasing APP***

(A)the protein expression of Aβ1-42

Aβ1-42 control 0.35 3.5 35 350 700ng/mL


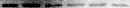


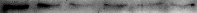


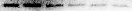


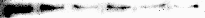


β-ACTIN


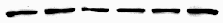


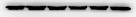


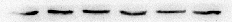


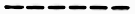


(B)the protein expression of PS1

PS1 control 0.35 3.5 35 350 700ng/mL


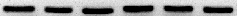


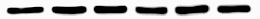


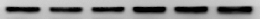


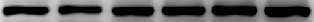


GAPDH


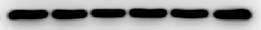


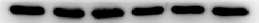


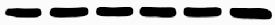


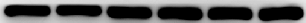


he protein expression of APP

(C) APP control 0.35 3.5 35 350 700ng/mL


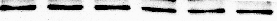


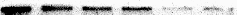


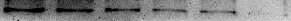


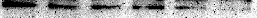


GAPDH


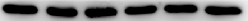


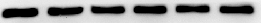


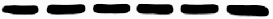


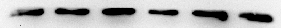


**Fig. 5.** DNLA reduced the production of Aβ through non-amyloidogenic pathways

1. the protein expression of ADAM10

ADAM10 control 0.35 3.5 35 350 700ng/mL


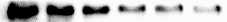


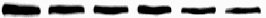


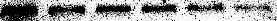


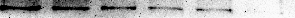


GAPDH


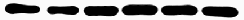


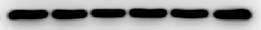


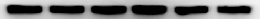


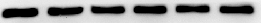


1. the protein expression of ADAM17

ADAM17 control 0.35 3.5 35 350 700ng/mL


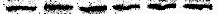


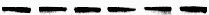


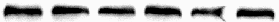


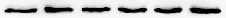


GAPDH


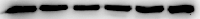


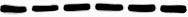


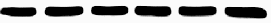


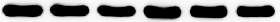


**Fig. 6. *DNLA decreased accumulation of Aβ by inducing BACE1 (β-secretase)***

the protein expression of ***BACE1***

***BACE1*** control 0.35 3.5 35 350 700ng/mL


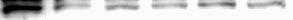


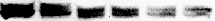


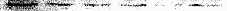


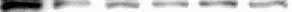


GAPDH


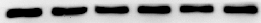


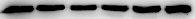


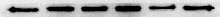


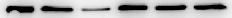

Supplement: Dataset S3 [file peerj-07-7627-s003.docx]
