# Supplementary material for: Dendrobium alkaloids decrease Aβ by regulating α- and β-secretases in hippocampal neurons of SD rats
Source: PeerJ. 2019 Sep 6;7:e7627. doi: 10.7717/peerj.7627 (PMC6733236; doi:10.7717/peerj.7627)
Supplement: Dataset S1 [file peerj-07-7627-s001.xlsx]

## Sheet: Sheet1
	Effects of DNLA on the cell viability of hippocampal neurons in SD Rat
	control	DNLA(ng/mL)
		0.35	3.5	35	350	700
	100	95.2475	96.4028	96.1006	98.0804	105.463
	100	91.7824	98.1851	103.739	105.274	99.8721
	100	98.7727	104.632	104.349	101.188	95.5952
	100	97.2	97.7	96.3	103.5	101.7
	DNLA decreased the accumulation of Aβ through decreasing APP
	The protein expression level of Aβ1-42
	control	DNLA(ng/mL)
		0.35	3.5	35	350	700
	100	86.4878	79.5288	64.3583	54.6284	47.3195
	100	114.015	108.924	83.5753	62.8801	56.2505
	100	106.428	93.4906	69.3554	56.5568	60.7881
	100	50.8798	41.3807	56.8009	53.3437	39.0579
	The protein expression level of PS1
	100	103.115	114.443	105.528	97.8781	118.546
	100	96.4631	80.3594	83.0721	80.7977	73.0784
	100	103.115	114.443	105.528	97.8781	118.546
	100	120.577	106.109	102.068	72.0282	71.1
	The protein expression level of APP
	control	DNLA(ng/mL)
		0.35	3.5	35	350	700
	100	105.196	83.0218	76.3896	71.4926	75.6496
	100	66.711	90.1834	86.701	67.2134	55.513
	100	53.6847	74.4588	68.2903	61.2611	76.5183
DNLA decreased the accumulation of Aβ through regulating α-secretase
	The protein expression level of ADAM10
	control	DNLA(ng/mL)
		0.35	3.5	35	350	700
	100	105.227	90.3241	76.6552	67.9285	47.9412
	100	96.5954	64.698	67.9722	62.4834	51.0546
	100	104.557	86.2498	73.095	60.9355	56.1246
	100	86.9303	72.4972	63.4707	60.5224	62.5967
	The protein expression level of ADAM17
	control	DNLA(ng/mL)
		0.35	3.5	35	350	700
	100	113.783	98.8196	83.7211	80.6324	88.7897
	100	115.322	109.051	104.58	92.4537	84.1523
	100	111.523	91.6633	82.584	75.775	100.42
	100	119.982	103.989	95.1949	107.155	99.24
DNLA decreased accumulation of Aβ through inducing BACE1 (β-secretase)
	control	DNLA(ng/mL)
		0.35	3.5	35	350	700
	100	65.6816	50.5916	46.4127	48.7707	46.2378
	100	74.3561	78.5742	75.9247	70.1878	68.7538
	100	94.101	114.053	83.0163	51.2371	43.0835
